# Supplementary material
Source: HighWire-hosted journal article supplement (https://bmjopen.bmj.com/content/8/7/e022549)
Supplement: inline-supplementary-material-1 [file inline-supplementary-material-1.pdf]

## Appendix A: HOMEWARD Phase 1- Coding for SWASFT/ EEAST Data

### CODES

#### Call Colour codes:

- 1- red
- 2- green
- 3- amber- not available in EEAST

#### See Treat or Convey codes

- 1- See & Treat
- 2- See & Convey (include transport only in EEAST)

#### Qualification codes- identify most senior clinician recorded at scene

1. Technician
2. Paramedic/SWAMP paramedic
3. Lead Paramedic
4. Specialist Paramedic/Critical Care Paramedic
5. Other- contains the following
  - a. BLS trained (first responder)
  - b. Ambulance Care Assistant
  - c. Emergency Care Assistant
  - d. Student Paramedic
  - e. Operational Officer
  - f. Doctor

#### Gender codes

- 1- Male
- 2- Female

#### Presenting condition codes

| SWASFT                                            | EEAST                                              |
|---------------------------------------------------|----------------------------------------------------|
| 1- General                                        | Other                                              |
| 2- Cardiac                                        | AF, Heart Failure, Hypertension, MI, other cardiac |
| 3- Respiratory                                    | Asthma, COPD, other respiratory                    |
| 4- Endocrine                                      | Diabetes I or II, also other for thyroid           |
| 5- Neurological                                   | Stroke/ CVA, TIA, Other neurological               |
| 6- Gastro-Intestinal                              | Other                                              |
| 7- Musculoskeletal                                | Musculoskeletal                                    |
| 8- Obs/gynae                                      | Other                                              |
| 9- Cancer                                         | Other                                              |
| 10- Mental health                                 | Mental Health                                      |
| 11- Trauma (excluding self-harm)                  | Trauma                                             |
| 12- Other medical                                 | Other                                              |
| 13- Social                                        | Social                                             |
| 14- Other (any condition not otherwise specified) | Other                                              |

|                                |                                           |
|--------------------------------|-------------------------------------------|
| 15- Deliberate self-harm       | Suicide/ self-harm                        |
| 16- Environmental              | Other                                     |
| (17- Sepsis) see other medical | Other e.g. UTI, Chest Infection           |
| 18- Poisoning (accidental)     | Other                                     |
| 19- Burns                      | Other                                     |
|                                | Cognitive impairment/ confusion- delirium |
|                                | Dementia                                  |
|                                | Nil apparent                              |
|                                | Palliative                                |

#### Provisional diagnosis codes

| <b>SWASFT</b>                                     | <b>EEAST</b>                                       |
|---------------------------------------------------|----------------------------------------------------|
| 1- General                                        | Other                                              |
| 2- Cardiac                                        | AF, Heart Failure, Hypertension, MI, other cardiac |
| 3- Respiratory                                    | Asthma, COPD, other respiratory                    |
| 4- Endocrine                                      | Diabetes I or II, also other for thyroid           |
| 5- Neurological                                   | Stroke/ CVA, TIA, Other neurological               |
| 6- Gastro-Intestinal                              | Other                                              |
| 7- Musculoskeletal                                | Musculoskeletal                                    |
| 8- Obs/gynae                                      | Other                                              |
| 9- Cancer                                         | Other                                              |
| 10- Mental health                                 | Mental Health                                      |
| 11- Trauma (excluding self-harm)                  | Trauma                                             |
| 12- Other medical                                 | Other                                              |
| 13- Social                                        | Social                                             |
| 14- Other (any condition not otherwise specified) | Other                                              |
| 15- Deliberate self-harm                          | Suicide/ self-harm                                 |
| 16- Environmental                                 | Other                                              |
| (17- Sepsis) see other medical                    | Other e.g. UTI, Chest Infection                    |
| 18- Poisoning (accidental)                        | Other                                              |
| 19- Burns                                         | Other                                              |
|                                                   | Cognitive impairment/ confusion- delirium          |
|                                                   | Dementia                                           |
|                                                   | Nil apparent                                       |
|                                                   | Palliative                                         |

### Search terms for target and control groups:

#### Target group:

Dementia, Alzheimer's, Fronto-temporal dementia, vascular dementia, senility, Pick's disease, Lewy Body disease/ dementia

- 1- Dementia present - Presence of the diagnosis of one of the above
- 2- Dementia suspected - paramedic suggests dementia may be present eg ? dementia, seeing memory nurse, taking dementia medication
- 3- Dementia inferred - Paramedic infers ongoing problem through use of other language such mild cognitive impairment, cognitive impairment, memory loss. Sometimes this might also be called confusion but is not acute. This might be confirmed as 'normal or usual for the patient'.

#### Control group:

Confusion- acute, delirium,

- 4- Presence of one of the above

#### Drugs search terms:

Drugs: Acumor (XL), **Aricept**, Axurer, Consium XL, **Donepezil**, Ebixa, Elmino, Exelon, **Galantamine**, Galsya (XL), Gazylan XL, Gatalin (XL), Kerstipon, Lotprosin XL, Luventa XL, Maruxa, **Memantine**, Nemdatine, Nimvastid, Reminyl (XL), **Rivastigmine**, Valios.

PATCHES: Alzest, Eluden, Prometax, Rivatev, Voleze

- 1- Presence of these drugs in case record

#### Social History code:

- 1- lives alone, no care package
- 2- lives alone, with care package
- 3- lives with spouse/ partner, no care package
- 4- lives with spouse/ partner, with care package
- 5- lives with extended family, no care package
- 6- lives with extended family, with care package
- 7- nursing home
- 8- residential home
- 9- other

#### Location codes:

- 1- Home
- 2- Nursing home
- 3- Residential Home
- 4- Public place
- 5- Other
- 6- Not documented

**Capacity to consent**

- 1- Patient has capacity
- 2- Patient does not have capacity

**Rockwood Frailty code:**

- 1- Very Fit
- 2- Well
- 3- 3 Managing Well
- 4- Vulnerable
- 5- Mildly Frail
- 6- Moderately Frail
- 7- Severely Frail
- 8- Very Severely Frail
- 9- Terminally Ill

**Falls**

Search conducted in presenting condition and HPC for fall related calls. This is to ensure those coded later as trauma are also coded for falls. Falls are coded as present if they occurred within last 6 days and have contributed to the call.

Search terms fall, fell, slip, trip
